# Supplementary material for: The accuracy of prediction of genomic selection in elite hybrid rye populations surpasses the accuracy of marker-assisted selection and is equally augmented by multiple field evaluation locations and test years
Source: PubMed Central journal article supplement (PMC4101178; doi:10.1186/1471-2164-15-556), 2014-07-04
Supplement: 12864_2014_6247_MOESM3_ESM.pdf [file 12864_2014_6247_MOESM3_ESM.pdf]

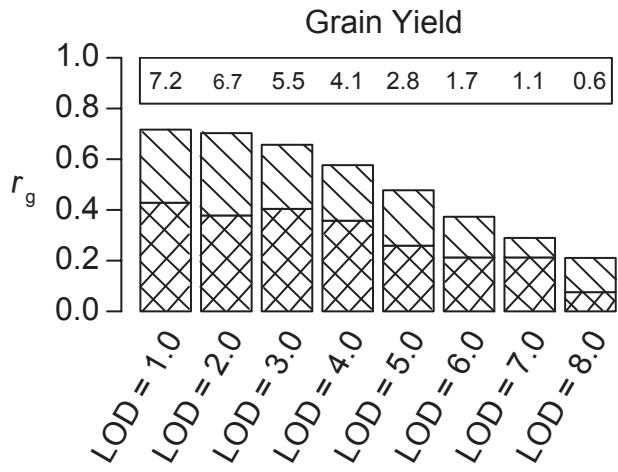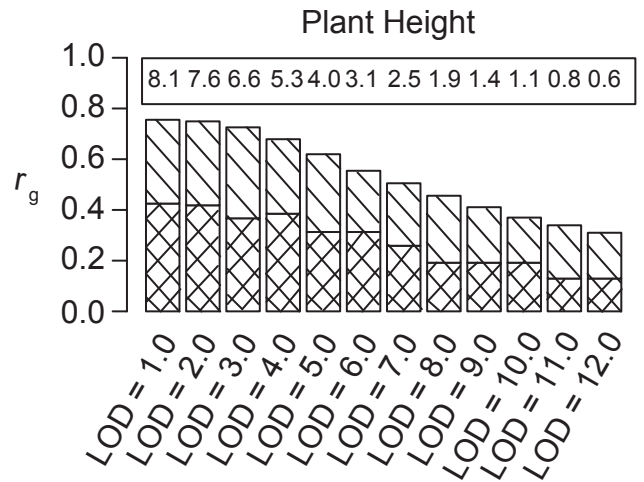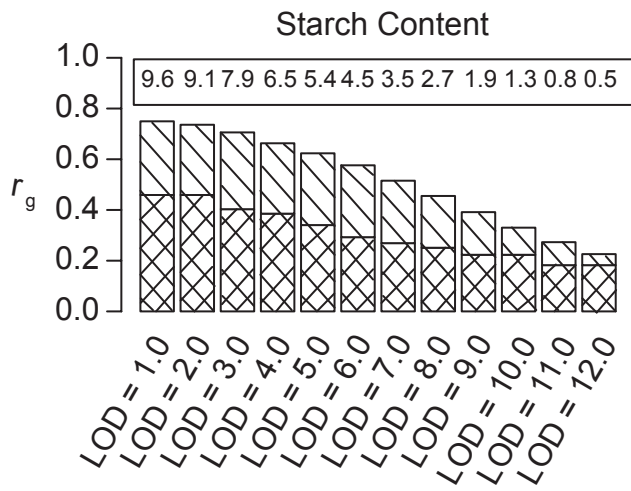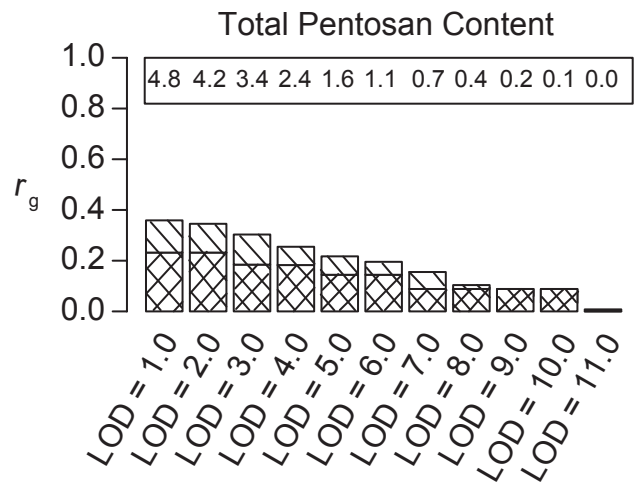

 MAS-QTL  
 MAS-NEUT

Wang et al. Figure S3
